# Supplementary material
Source: PubMed Central journal article supplement (PMC2265134)

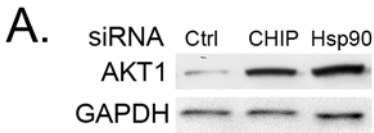

**B.**

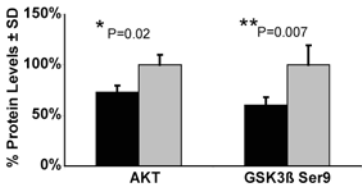

**C.**

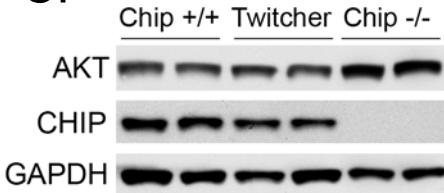

Supplement: pnas_0709180105_1.pdf [file pnas_0709180105_1.pdf]

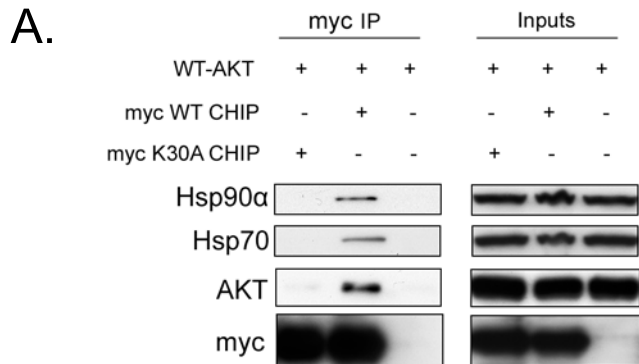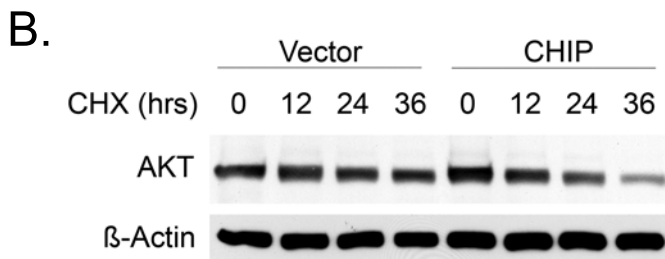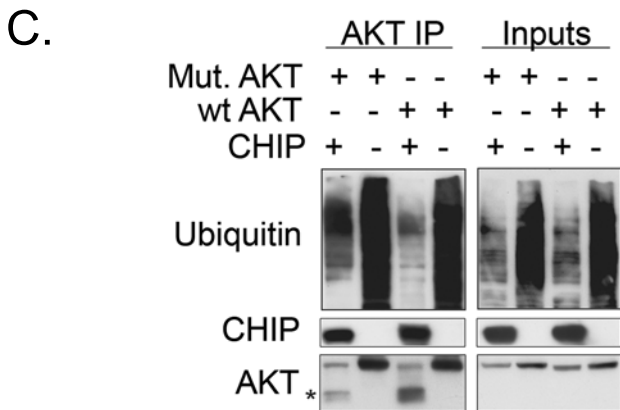

Supplement: pnas_0709180105_2.pdf [file pnas_0709180105_2.pdf]

**A.**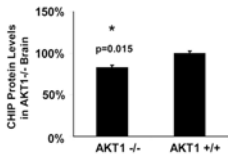**B.**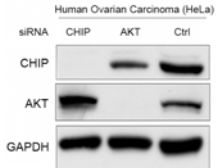**C.**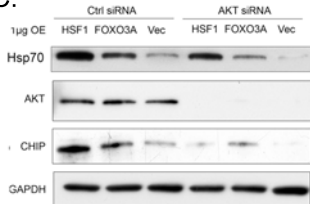**D.**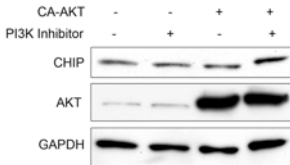

Supplement: pnas_0709180105_3.pdf [file pnas_0709180105_3.pdf]

**A.** siRNA      Ctrl      AKT (A)      AKT (B)

Total AKT

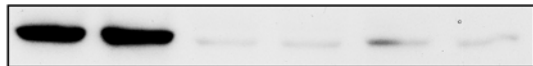

GAPDH

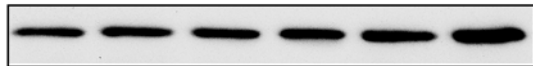

**B.**

LY294002

+    +    -    -    +    +

17AAG [ $\mu$ M]

0.1    1    0.1    1    -    -

Hsp70

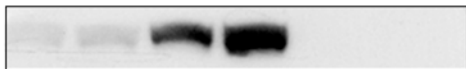

GAPDH

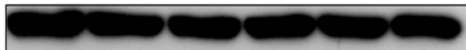

Supplement: pnas_0709180105_4.pdf [file pnas_0709180105_4.pdf]

### V5 IP

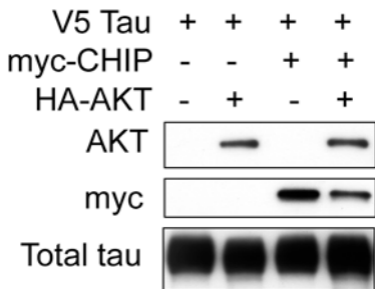

### Inputs

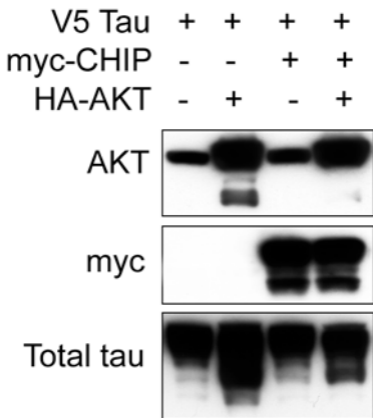

Supplement: pnas_0709180105_5.pdf [file pnas_0709180105_5.pdf]
